# Supplementary material
Source: PubMed Central journal article supplement (PMC8290719)
Supplement: ajtr0013-6076-f6.pdf [file ajtr0013-6076-f6.pdf]

## circUBE2D2 promotes HCC sorafenib resistance and glycolysis

**Table S1.** Primers sequences for qRT-PCR and sequences of shRNA

|                 | Sequences                                                                     |
|-----------------|-------------------------------------------------------------------------------|
| circUBE2D2      | forward, 5'-CACAGTGGTCTCCAGCACTA-3'<br>reverse, 5'-TTGAAGGGGTAATCTGTTGGGAA-3' |
| sh-circUBE2D2-1 | 5'-TTCAAAAGTGTCCATTGGCA-3'                                                    |
| sh-circUBE2D2-2 | 5'-TCAAAGTGTCCATTGGCAA-3'                                                     |
| sh-circUBE2D2-3 | 5'-ATTCAAAGTGTCCATTGG-3'                                                      |
| LDHA            | forward, 5'-ATGGCAACTCTAAAGGATCAGC-3'<br>reverse, 5'-CCAACCCCAACAAGTGAATCT-3' |
| U6              | forward, 5'-CTCGCTTCGGCAGCACA-3'<br>reverse, 3'-AACGCTTCACGAATTTGCG-5'        |
| GAPDH           | forward, 5'-ACAACCTTGGTATCGTGAAGG-3'<br>reverse, 5'-GCCATCACGCCACAGTTTC-3'    |
